# Supplementary material for: An assessment of oil palm plantation aboveground biomass stocks on tropical peat using destructive and non-destructive methods
Source: PubMed Central journal article supplement (PMC7010673; doi:10.1038/s41598-020-58982-9), 2020-02-10
Supplement: 41598_2020_58982_MOESM1_ESM.pdf [file 41598_2020_58982_MOESM1_ESM.pdf]

**An assessment of oil palm plantation aboveground biomass stocks on tropical peat using destructive and non-destructive methods**

**Kennedy Lewis<sup>1</sup>, Elisa Rumpang<sup>2</sup>, Lip Khoon Kho<sup>2</sup>, Jon McCalmont<sup>1</sup>, Yit Arn Teh<sup>3</sup>, Angela Gallego-Sala<sup>1</sup>, Timothy Charles Hill<sup>1</sup>**

<sup>1</sup> College of Life and Environmental Science, University of Exeter, Streatham Campus, Rennes Drive. Exeter, EX4 4RJ. UK

<sup>2</sup> Tropical Peat Research Institute, Biological Research Division, Malaysian Palm Oil Board, 6, Persiaran Institusi, Bandar Baru Bangi, 43000 Kajang, Selangor, Malaysia

<sup>3</sup> School of Natural and Environmental Science, Newcastle University, Drummond Building, Newcastle-upon-Tyne, NE1 7RU UK

Corresponding Autor: Kennedy Lewis (contact: [k1378@exeter.ac.uk](mailto:k1378@exeter.ac.uk))

**Supplementary Material**

| Source                                        | Method | Location/Region            | Planting Density | Soil    | Note                                                                                |
|-----------------------------------------------|--------|----------------------------|------------------|---------|-------------------------------------------------------------------------------------|
| Henson and Dolmat (2003) <sup>10</sup>        | ND     | Peninsular Malaysia        | 160              | Peat    |                                                                                     |
| Melling et al (2007) <sup>57</sup>            | ND     | Sarawak, Malaysia          | -                | Peat    |                                                                                     |
| Breure (1982) <sup>58</sup>                   | ND     | Papua New Guinea           | -                | Mineral |                                                                                     |
| Breure (1988) <sup>59</sup>                   | ND     | Papua New Guinea           | -                | Mineral |                                                                                     |
| Dufrene (1989) <sup>60</sup>                  | ND     | Ivory Coast                | -                | Mineral |                                                                                     |
| Henson (unpublished, 1993-95) <sup>40</sup>   | ND     | Selangor, Malaysia         | -                | Mineral |                                                                                     |
| Kwan (1994) <sup>41</sup>                     | ND     | Sabah, Malaysia            | 143              | Mineral |                                                                                     |
| Henson (1995) <sup>61</sup>                   | ND     | Selangor, Malaysia         | -                | Mineral |                                                                                     |
| Lamade and Setiyo (1996) <sup>62</sup>        | ND     | Sumatra, Indonesia         | -                | Mineral |                                                                                     |
| Henson (1998) <sup>63</sup>                   | ND     | Selangor, Malaysia         | -                | Mineral |                                                                                     |
| Palm et al (1999) <sup>64</sup>               | ND     | Cameroon                   | -                | Mineral |                                                                                     |
| Tjitrosemito and Mawardi (2000) <sup>65</sup> | ND     | Indonesia                  |                  |         |                                                                                     |
| Banabas (2002) <sup>66</sup>                  | ND     | Papua New Guinea           | 130              | Mineral |                                                                                     |
| Henson (2007) <sup>67</sup>                   | ND     | Kedah, Malaysia            | -                | Mineral |                                                                                     |
| Morel et al (2011) <sup>44</sup>              | ND     | Sabah, Malaysia            | -                | Mineral |                                                                                     |
| Rees and Tinker (1963) <sup>26</sup>          | D      | Nigeria                    | -                |         | Destructive harvest: 7 to 22 YAP, 3 repetitions per age class                       |
| Ng et al. (1968) <sup>68</sup>                | D      | Peninsular Malaysia        | -                | Mineral |                                                                                     |
| Corley et al (1971) <sup>11</sup>             | D      | Peninsular Malaysia        | 148              | Mineral | Destructive harvest: 1.5 to 27.5 YAP, 38 repetitions per age class                  |
| Khalid et al. (1999) <sup>12,13</sup>         | D      | Peninsular Malaysia        | -                | Mineral | Destructive harvest: 23 YAP, 10 repetitions                                         |
| Thenkabail et al. (2004) <sup>46</sup>        | D      | Benin                      | -                | Mineral | Destructive harvest: Trunk heights of 0.28 to 1.95 m, 7 palms samples (YAP unknown) |
| Syahrinudin (2005) <sup>30</sup>              | D      | Sumatra, Indonesia         | -                | Mineral | Destructive harvest: 3 to 33 YAP, 3 repetitions per age class                       |
| Legros et al. (2006) <sup>69</sup>            | D      | East Kalimantan, Indonesia | -                | Mineral |                                                                                     |
| Koh et al. (2019) <sup>70</sup>               | D, ND  | Sarawak, Malaysia          | -                | Mineral | Destructive harvest: 21 YAP, 10 repetitions                                         |

**Table S1: Oil palm plot AGB per hectare.** Source material for Figure 6. Outline of studies assessing OP aboveground biomass stocks on mineral soils and peat soils using destructive (D) and non-destructive (ND) methods, planting densities included where possible.

| Sample No | YAP | No of Fronds | Trunk DBH (m) * | Trunk Length (m)** | Lean Category*** |
|-----------|-----|--------------|-----------------|--------------------|------------------|
| 1         | 12  | 49           | 0.50            | 4.53               | M                |
| 2         | 12  | 40           | 0.48            | 3.60               | U                |
| 3         | 12  | 35           | 0.50            | 3.70               | U                |
| 4         | 8   | 40           | 0.69            | 1.62               | U                |
| 5         | 8   | 34           | 0.63            | 1.13               | U                |
| 6         | 8   | 40           | 0.64            | 1.45               | U                |
| 7         | 3   | 35           | 0.45            | 0.23               | -                |
| 8         | 3   | 38           | 0.27            | 0.22               | -                |
| 9         | 3   | 41           | 0.37            | 0.18               | -                |

**Table S2: Characteristics oil palms destructively harvested**

\* Trunk DBH measured at breast height (1.30m) using callipers to exclude frond bases, trunk diameter was measured at the trunk midpoint where trunk heights were < 1.3m.

\*\* Trunk length was measured to the frond ranked 33 (L33). Where palms were leaning, the trunk length along the inner curve of the palm trunk was recorded.

\*\*\* Leaning categories: M = Mildly leaning, U = Upright.

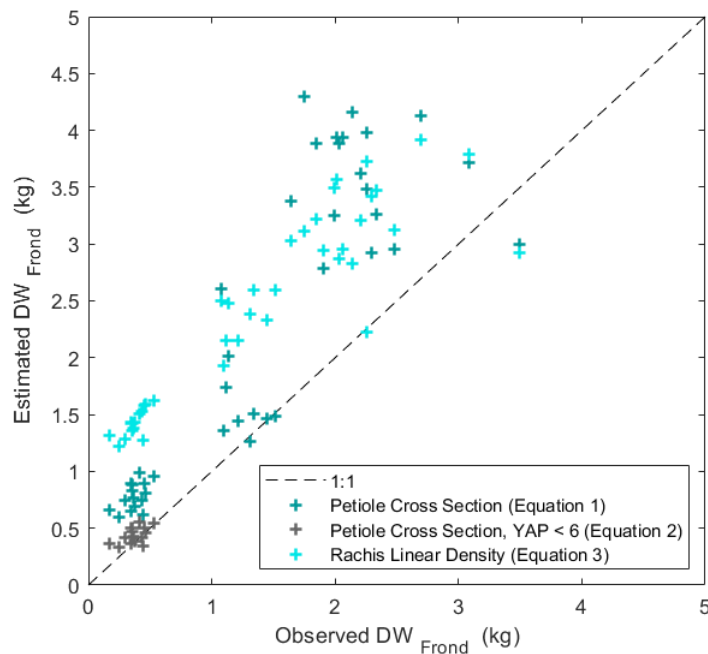

**Figure S1: Frond DW predicted using existing equations vs observed frond DW (1:1 line indicated). The equations tested use the petiole cross section (Equation 1, Corley et al, 1971<sup>11</sup> and Equation 2, Henson, 1993<sup>10</sup>) and the rachis linear density (Equation 3, Aholoukpè et al, 2013<sup>43</sup>) to estimate the DW of a single frond.**

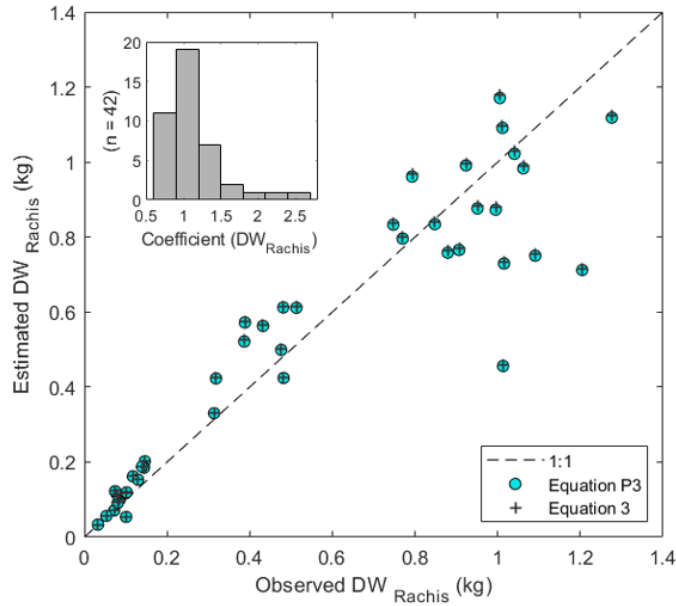

**Figure S2: *Rachis* dry weight ( $DW_{Rachis}$ ) is estimated from the dry linear density of a rachis fragment. *Rachis* DW predicted using an existing equation (Equation 3) and an equation derived for peat (Equation P3) are plotted against the observed rachis DW (1:1 line indicated). The distribution of coefficients accounting for the non-constant sectional area of the rachis for each frond are shown (Equation P3, top left).**

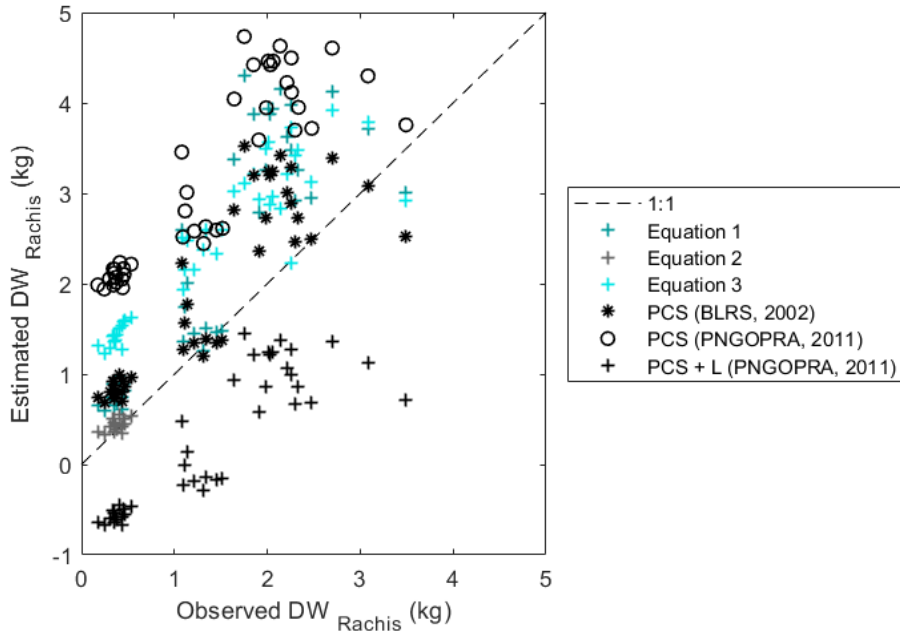

**Figure S3: Frond DW predicted using existing equations vs the observed frond DW (1:1 line indicated). Equations tested use the petiole cross section (PCS) and the petiole cross section when combined with frond length (PCS + L) to estimate the DW of a single frond. Allometries recorded in Corley and Tinker, 2016<sup>71,72</sup>.**

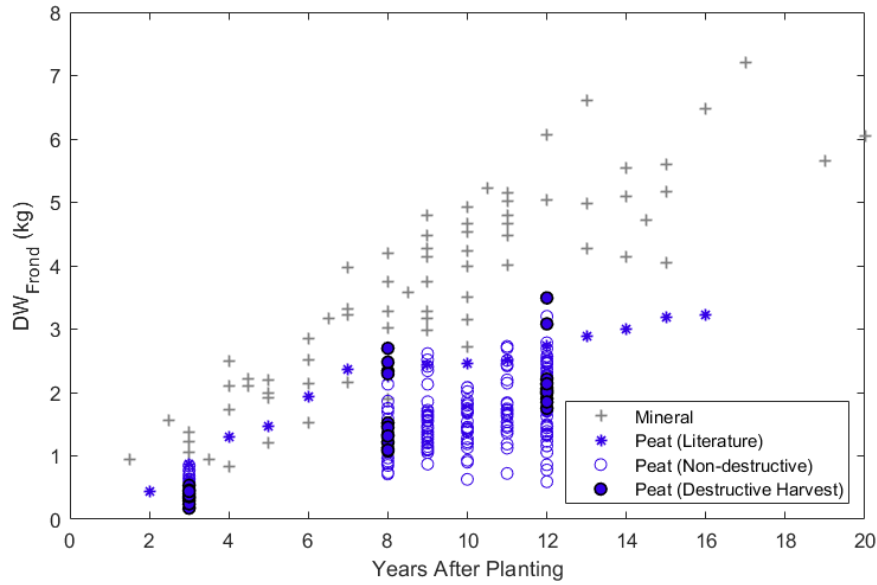

**Figure S4: Single frond dry weights on mineral and peat soils.** Dry weight of fronds sampled in the non-destructive plot survey (Peat (Non-destructive)) are calculated using Equation P1, destructively harvested fronds are also included. Adapted from Henson 2005<sup>29</sup>, including fronds on peat soils (Henson and Dolmat, 2003).

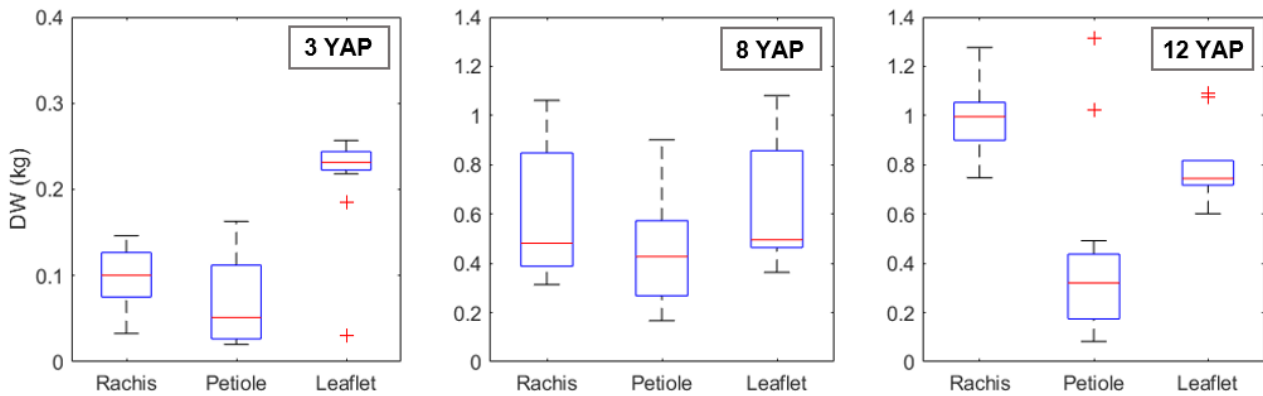

**Figure S5: Frond component dry weight distribution in immature, young-mature and mature palms.** Frond component dry with distribution of single fronds ranked 1, 9, 17, 25 and 33 (rachis, petiole and leaflet) in immature (3 YAP), young-mature (8 YAP) and mature (12 YAP) palms. Outliers indicated in red.

| No | Component | Equation                                                      | Reference                            | Note                                                                                                               |
|----|-----------|---------------------------------------------------------------|--------------------------------------|--------------------------------------------------------------------------------------------------------------------|
| S1 | Palm DW   | $DW_{Palm} = (0.0976 \times T_{Height} + 0.0706) \times 1000$ | Dewi et al, 2009 <sup>47</sup>       | $\sim 0.5 > T_{height} > 9$ (m)<br>Derived from semi-destructive methods ( $R^2 = 0.7342$ )<br>Location: Indonesia |
| S2 | Palm DW   | $DW_{Palm} = 37.47T_{Height} + 3.6334$                        | Thenkabail et al, 2004 <sup>46</sup> | N = 8<br>$0.28 > T_{height} > 1.95$ (m)<br>Location: Benin                                                         |

**Table S3: Existing allometric equations for estimating total oil palm dry weight (kg).** Where  $DW_{Palm}$  is palm dry weight and  $T_{Height}$  is trunk height to frond 33 (m).

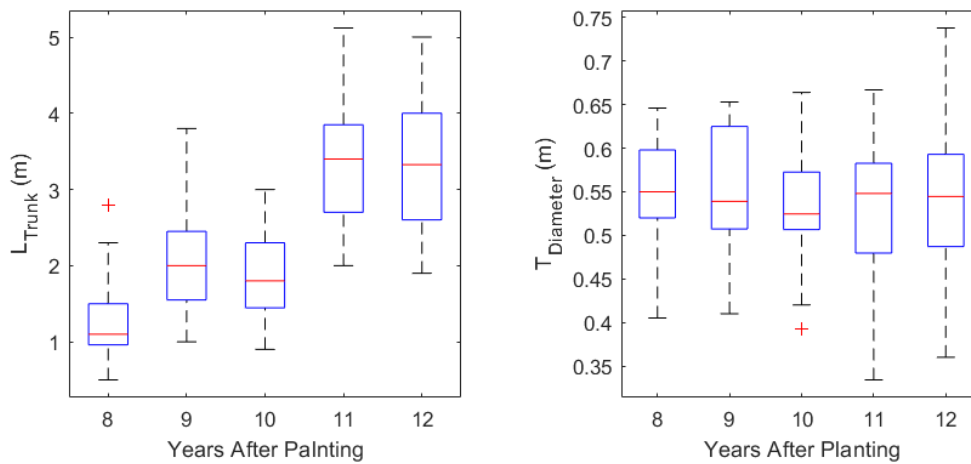

**Figure S6: Trunk length (left) and DBH (right) (m) as measured in non-destructive surveys.** Data pooled for all plots of the same age. Outliers indicated in red.

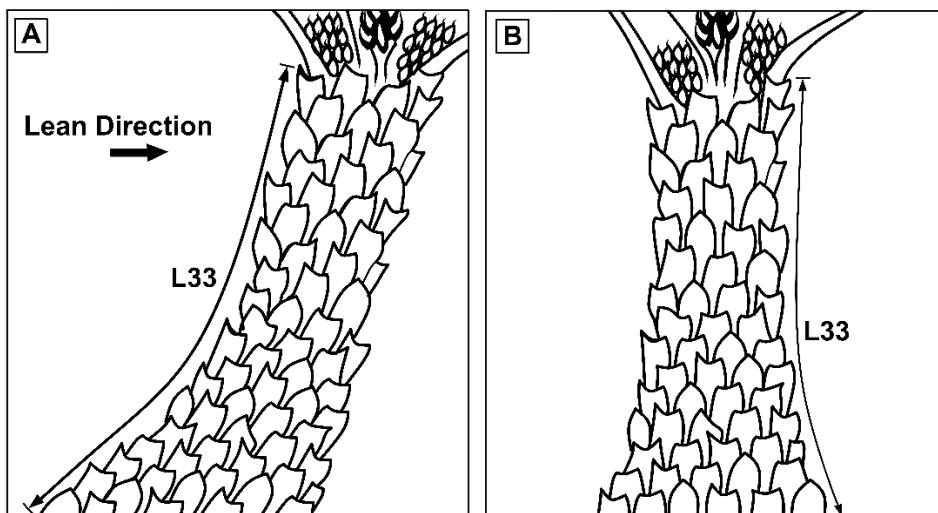

**Figure S7: Oil palm leaning and length measurement.** Diagram A shows a mildly leaning palm mature palm, Diagram B an upright palm. Trunk length (L33) is measured along the inner curve of the trunk parallel to the lean direction in mildly leaning palms.

| Leaning Category |                                                                                          |
|------------------|------------------------------------------------------------------------------------------|
| Upright          | Upright                                                                                  |
| Mild             | Leaning at $< 45^\circ$ from the vertical                                                |
| Severe           | Leaning at $> 45^\circ$ from the vertical                                                |
| Recovered        | Leaning palms returning upright state                                                    |
| Fallen (Alive)   | Fallen live palm (parallel to the peat), partially rooted                                |
| Fallen (Dead)    | Fallen dead palm (parallel to the peat), uprooted                                        |
| Replanted        | Immature palm, notably younger than the block age (refill palm following palm mortality) |
| Missing          | Missing palm in planting grid                                                            |

**Table S4: Categorisation of Oil Palm Leaning on Tropical Peats**

| <b>Plot Id</b> | <b>Lat (N)</b> | <b>Long (E)</b> | <b>YAP</b> | <b>Measurement</b> |
|----------------|----------------|-----------------|------------|--------------------|
| <b>1</b>       | 3.1773         | 113.3729        | 12         | D, ND              |
| <b>2</b>       | 3.1744         | 113.3697        | 12         | D, ND              |
| <b>3</b>       | 3.1705         | 113.3711        | 12         | D, ND              |
| <b>4</b>       | 3.1640         | 113.4187        | 8          | D, ND              |
| <b>5</b>       | 3.1622         | 113.4180        | 8          | D, ND              |
| <b>6</b>       | 3.1628         | 113.4162        | 8          | D, ND              |
| <b>7</b>       | 3.1609         | 113.4207        | 3          | D, ND              |
| <b>8</b>       | 3.1594         | 113.4207        | 3          | D, ND              |
| <b>9</b>       | 3.1604         | 113.4179        | 3          | D, ND              |
| <b>10</b>      | 3.1658         | 113.3524        | 9          | ND                 |
| <b>11</b>      | 3.1884         | 113.4631        | 9          | ND                 |
| <b>12</b>      | 3.1879         | 113.4612        | 9          | ND                 |
| <b>13</b>      | 3.1846         | 113.4593        | 9          | ND                 |
| <b>14</b>      | 3.2333         | 113.4792        | 10         | ND                 |
| <b>15</b>      | 3.2328         | 113.4803        | 10         | ND                 |
| <b>16</b>      | 3.2267         | 113.4723        | 10         | ND                 |
| <b>17</b>      | 3.2267         | 113.5069        | 11         | ND                 |
| <b>18</b>      | 3.2121         | 113.5007        | 11         | ND                 |
| <b>19</b>      | 3.2142         | 113.5035        | 12         | ND                 |
| <b>20</b>      | 3.1559         | 113.3360        | 11         | ND                 |
| <b>21</b>      | 3.1524         | 113.3277        | 11         | ND                 |
| <b>22</b>      | 3.1661         | 113.3467        | 12         | ND                 |

**Table S5: Plot locations, Sarawak, Malaysia.** Coordinates of OPs destructively harvested (D) and non-destructive plot surveys (ND), decimal degrees. Years after planting (YAP) at the time of measurement recorded (February 2019).



## Supplementary References

- 57) Melling L., Goh K.J., Beauvais C. & Hatano R. Carbon flow and budget in a young mature oil palm agroecosystem on deep tropical peat. In: Proc. Conf. International Symposium and Workshop on Tropical Peatland. International Peat Society, Yogyakarta, Indonesia, (2007).
- 58) Breure, C.J. Factors affecting yield and growth of oil palm tenera in West New Britain. *Oleagineux*, **37**, 213-227 (1982).
- 59) Breure, C.J. The effect of palm age and planting density on the partitioning of assimilates in oil palm (*Elaeis guineensis*). *Exp. Agric.* **24**, 53-66 (1988).
- 60) Dufrene E. (1989). Photosynthese, consommation en eau et modélisation de la production chez le palmier à huile (*Elaeis guineensis* Jacq.). (Université Paris-Sud Orsay, 1989).
- 61) Henson, I.E. Carbon assimilation, water use and energy balance of an oil palm plantation assessed using micrometeorological techniques. In: Proc. Conf. 1993 PORIM International Palm Oil Congress. Palm Oil Research Institute of Malaysia, Kuala Lumpur (1995).
- 62) Lamade E and Setiyo I E. (1996). Test of Dufrene's production model on two contrasting families of oil palm in North Sumatra In: Proc. Conf. 1996 PORIM International Palm Oil Congress, Agricultural Conference. Palm Oil Research Institute of Malaysia, Kuala Lumpur (1996).
- 63) Henson I. E. Notes on oil palm productivity. I. Productivity at two contrasting sites. *J. Oil Palm Res.* **10**, 57-67 (1998).
- 64) Palm, C.A. et al. Carbon sequestration and trace gas emissions in slash-and-burn and alternative land uses in the Humid Tropics. (ACB Climate Change Working Group, Final Report Phase II, 1999).
- 65) Tjitrosemito, S. & Mawardi, I. Terrestrial carbon stock of oil palm plantation. In: Proc. Conf. Science and Policy Workshop on Terrestrial Carbon and Possible Trading under the CDM. IC-SEA, BIOTROP, Bogor, Indonesia, 2000.
- 66) Banabas, M. Agronomy Field Trial 305, Final Report. PNGOPRA, Papua New Guinea, 2002.
- 67) Henson I.E., Zuraidah, Y., Mohd Roslan, M.N., Mohd Haniff, H. & Tarmizi, A.M. Predicting soil water status, evapotranspiration, growth and yield of oil palm in a seasonally dry region of Malaysia. *J. Oil. Palm. Res.* **19**, 398-415 (2007).
- 68) Ng S. K., Thamboo, S. & de Souza, P. Nutrient contents of oil palms in Malaya. II. Nutrients in vegetative tissues. *Malay. Agric.* **46**, 332-390 (1968).
- 69) Legros, S. et al. (2006). Carbohydrate reserves in 9 years old oil palm: nature, distribution and seasonal changes. In: Proc. Conf. 2006 International Oil Palm Conference, Bali, 2006.
- 70) Koh, L.K., Rumpang, E., Kamarudin, N. and Haryn. M.H. Quantifying total carbon stock of mature oil palm. *J. Oil. Palm. Res.* **31**, 521-527 (2019).
- 71) PNGOPRA. *2011 Annual Research Report*. (Papua New Guinea Oil Palm Research Association, Kimbe, Papua New Guinea, 2011).
- 72) BLRS. *Annual Research report, 2001*. (Bah Lias Research Station, North Sumatra, 2002).
